# Supplementary material for: Prevalence, Genetics and Evolutionary Properties of Eurasian Avian-like H1N1 Swine Influenza Viruses in Liaoning
Source: Viruses. 2022 Mar 20;14(3):643. doi: 10.3390/v14030643 (PMC8953428; doi:10.3390/v14030643)
Supplement: Supplementary file 1 [file viruses-14-00643-s001.zip › viruses-1598072-Supplementary Materials Revised.pdf]

Supplementary Materials

# Prevalence, genetics and evolutionary properties of Eurasian avian-like H1N1 swine influenza viruses in Liaoning

Hailing Li, Haoyu Leng, Siqi Tang, Chaofan Su, Yina Xu, Yongtao Wang, Jiaming Lv, Shiwei Zhang, Yali Feng, Shaokang Song and Ying Zhang \*

**Table S1.** Pig nasal swabs sampling details in this study.

| City | Sampling Month | Pig Farms and Its Production Modes             | The Quantity of Live Hogs | Sampling Times | Positive /Total       | Name of Representative Strain |
|------|----------------|------------------------------------------------|---------------------------|----------------|-----------------------|-------------------------------|
| JZ   | Jan.           | No.1: Wean to finish                           | 4400                      | 2              | 14/575, 17/353        | JZ164, JZ266                  |
|      | Mar.           | No.2: Wean to finish                           | 6600                      | 2              | 0/436, 4/324          | H1N2                          |
|      | Jul.           | No.1: Wean to finish                           | 4400                      | 1              | 5/600                 | H1N2                          |
|      | Sept.          | No.2: Wean to finish                           | 6600                      | 1              | 7/418                 | H1N2                          |
|      | Oct.           | No.3: Self-propagation pig farm with 600 sows  | 3000                      | 1              | 8/457                 | H1N2                          |
| FS   | Feb.           | No.4: Wean to finish                           | 12000                     | 1              | 0/388                 | —                             |
|      | May.           | No.4/No.5: Wean to finish                      | 12000/2400                | 2              | 19/726, 8/407         | FS1553, FS1084                |
|      | Nov.           | No.4: Wean to finish                           | 12000                     | 1              | 0/613                 | —                             |
| PJ   | Apr.           | No.6: Self-propagation pig farm with 1000 sows | 5000                      | 1              | 0/335                 | —                             |
|      | Mar.           | No.7: Wean to finish                           | 9600                      | 2              | 15/518, 18/905        | PJ521, PJ626                  |
|      | Aug.           | No.7: Wean to finish                           | 9600                      | 1              | 0/247                 | —                             |
|      | Nov.           | No.8: Self-propagation pig farm with 1000 sows | 5000                      | 1              | 0/326                 | —                             |
|      | Jan.           | No.9: Wean to finish                           | 12000                     | 1              | 65/1510               | DL1022                        |
| DL   | Apr.           | No.9: Wean to finish                           | 12000                     | 1              | 23/526                | DL1007                        |
|      | Jun.           | No.9: Wean to finish                           | 12000                     | 1              | 0/551                 | —                             |
|      | Sept.          | No.9: Wean to finish                           | 12000                     | 1              | 0/668                 | —                             |
|      | Dec.           | No.9: Wean to finish                           | 12000                     | 1              | 4/726                 | DL5436                        |
|      | Jan.           | No.10: Wean to finish                          | 5000                      | 1              | 0/590                 | —                             |
| FX   | Mar.           | No.10: Wean to finish                          | 5000                      | 1              | 0/533                 | —                             |
|      | Jun.           | No.12: Self-propagation pig farm with 800 sows | 3900                      | 3              | 52/458, 36/428, 0/444 | FX1635, FX1638                |
|      | Jul.           | No.10: Wean to finish                          | 5000                      | 1              | 0/626                 | —                             |
|      | Oct.           | No.11: Self-propagation pig farm with 800 sows | 3900                      | 2              | 0/337, 0/456          | —                             |
|      | Feb.           | No.13: Self-propagation pig farm with 600 sows | 3000                      | 1              | 0/726                 | —                             |
| LY   | Apr.           | No.14: Wean to finish                          | 4800                      | 1              | 0/572                 | —                             |
|      | Aug.           | No.14: Wean to finish                          | 4800                      | 2              | 21/1437               | LY3468                        |
|      | Nov.           | No.13: Self-propagation pig farm with 600 sows | 3000                      | 1              | 28/642                | LY3478                        |
| AS   | Jan.           | No.15: Wean to finish                          | 7200                      | 1              | 0/286                 | —                             |
|      | Feb.           | No.15: Wean to finish                          | 7200                      | 1              | 0/314                 | —                             |
|      | Apr.           | No.15: Wean to finish                          | 7200                      | 1              | 0/352                 | —                             |
|      | Jul.           | No.15: Wean to finish                          | 7200                      | 1              | 23/833                | AS1732                        |
|      | Aug.           | No.15: Wean to finish                          | 7200                      | 1              | 52/1216               | AS1734                        |
|      | Dec.           | No.15: Wean to finish                          | 7200                      | 1              | 0/212                 | —                             |
|      | Jan.           | No.16: Wean to finish                          | 6000                      | 1              | 0/210                 | —                             |
| TL   | Mar.           | No.17: Self-propagation pig farm with 800 sows | 3900                      | 1              | 0/227                 | —                             |
|      | Apr.           | No.16: Wean to finish                          | 6000                      | 1              | 0/328                 | —                             |
|      | Jul.           | No.17: Self-propagation pig farm with 800 sows | 3900                      | 1              | 0/449                 | —                             |
|      | Nov.           | No.16: Wean to finish                          | 6000                      | 1              | 48/733                | TL5239                        |
|      | Dec.           | No.17: Self-propagation pig farm with 800 sows | 3900                      | 1              | 6/626                 | TL5404                        |

Table S1. Cont.

| City | Sampling Month | Pig Farms and Its Production Modes             | The Quantity of Live Hogs | Sampling Times | Positive /Total | Name of Representative Strain |
|------|----------------|------------------------------------------------|---------------------------|----------------|-----------------|-------------------------------|
| CY   | Mar.           | No.18: Wean to finish                          | 5000                      | 1              | 0/500           | —                             |
|      | May.           | No.19: Wean to finish                          | 3000                      | 1              | 0/588           | —                             |
|      | Sept.          | No.18: Wean to finish                          | 5000                      | 1              | 13/833          | CY1833                        |
|      | Oct.           | No.19: Wean to finish                          | 3000                      | 1              | 53/898          | CY3424                        |
| HLD  | Mar.           | No.20: Self-propagation pig farm with 700 sows | 3400                      | 1              | 0/473           | —                             |
|      | Jul.           | No.21: Wean to finish                          | 4000                      | 1              | 35/652          | HLD1706                       |
|      | Sept.          | No.20: Self-propagation pig farm with 700 sows | 3400                      | 1              | 5/426           | HLD1795                       |
|      | Nov.           | No.22: Wean to finish                          | 4800                      | 1              | 0/725           | —                             |
|      | Jan.           | No.23: Wean to finish                          | 2400                      | 1              | 8/125           | H1N2                          |
|      | Feb.           | No.24: Wean to finish                          | 3000                      | 1              | 1/269           | SY369                         |
|      | Mar.           | No.25: Wean to finish                          | 4800                      | 1              | 6/454           | H1N2                          |
|      | Apr.           | No.26:Self-propagation pig farm with 600 sows  | 3000                      | 1              | 29/413          | H3N2                          |
|      | May.           | No.27: Wean to finish                          | 2400                      | 1              | 3/266           | H1N2                          |
|      | Jun.           | No.25: Wean to finish                          | 4800                      | 1              | 2/397           | H1N2                          |
| SY   | Jul.           | No.28: Wean to finish                          | 5000                      | 1              | 0/179           | —                             |
|      | Aug.           | No.24: Wean to finish                          | 3000                      | 1              | 12/478          | SY1772                        |
|      | Sept.          | No.26:Self-propagation pig farm with 600 sows  | 3000                      | 1              | 7/89            | SY514                         |
|      | Oct.           | No.29: Wean to finish                          | 4000                      | 1              | 6/172           | H1N2                          |
|      | Nov.           | No.25: Wean to finish                          | 4800                      | 1              | 5/322           | H1N2                          |
|      | Dec.           | No.30: Wean to finish                          | 3000                      | 1              | 11/292          | H1N2                          |

Table S2. Primers were used in this study.

| Primer Name         | Primer Sequence (5'-3')     | Direction |
|---------------------|-----------------------------|-----------|
| Uni12               | AGCAAAAGCAGG                | Forward   |
| AIV-M-F             | AAGCGTCTACGCTGCAGTCC        | Forward   |
| AIV-M-R             | TTCTAACCGAGGTGCGAAAC        | Reverse   |
| PB2-amplification-F | AGCAAAAGCAGGTCAATTATATTC    | Forward   |
| PB2-amplification-R | AGTAGAAACAAGGTCGTTTTTAAACA  | Reverse   |
| PB1-amplification-F | AGCAAAAGCAGGTCAATTATATTC    | Forward   |
| PB1-amplification-R | AGTAGAAACAAGGCATTTTTTTCAT   | Reverse   |
| PA-amplification-F  | AGCAAAAGCAGGTACTGATCC       | Forward   |
| PA-amplification-R  | AGTAGAAACAAGGTACTTTTTTTGGA  | Reverse   |
| HA-amplification-F  | AGCAAAAGCAGGGGATAATA        | Forward   |
| HA-amplification-R  | AGTAGAAACAAGGGTGTTTTTTC     | Reverse   |
| NP-amplification-F  | AGCAAAAGCAGGGTAGATAATC      | Forward   |
| NP-amplification-R  | AGTAGAAACAAGGGTATTTTTTATTC  | Reverse   |
| NA-amplification-F  | AGCAAAAGCAGGAGTTCAAA        | Forward   |
| NA-amplification-R  | AGTAGAAACAAGGAGTTTTTTGAAC   | Reverse   |
| M-amplification-F   | AGCAAAAGCAGGTAGATATTTAAAG   | Forward   |
| M-amplification-R   | AGTAGAAACAAGGTAGTTTTTTACTCC | Reverse   |
| NS-amplification-F  | AGCAAAAGCAGGGTGAC           | Forward   |
| NS-amplification-R  | AGTAGAAACAAGGGTGTTTTTTATC   | Reverse   |

**Table S3.** Serum sampling details in this study.

| City | Sampling Month | Pig Farms and Its Production Modes             | The Quantity of Live Hogs | Sampling Times | Positive /Total |
|------|----------------|------------------------------------------------|---------------------------|----------------|-----------------|
| JZ   | Jan.           | No.1: Self-propagation pig farm with 800 sows  | 5000                      | 1              | 84/244          |
| FS   | Feb.           | No.2: Wean to finish                           | 12000                     | 1              | 50/116          |
| PJ   | Apr.           | No.3: Self-propagation pig farm with 600 sows  | 3000                      | 1              | 15/30           |
| DL   | Jan.           | No.4: Self-propagation pig farm with 600 sows  | 3000                      | 1              | 19/81           |
| FX   | Jan.           | No.4: Self-propagation pig farm with 600 sows  | 2000                      | 1              | 11/23           |
| LY   | Feb.           | No.6: Pig breeding farm                        | 1000                      | 1              | 20/87           |
| AS   | Jan.           | No.7: Pig breeding farm                        | 1200                      | 1              | 99/100          |
| TL   | Jan.           | No.8: Pig breeding farm                        | 1200                      | 1              | 91/316          |
| CY   | Mar.           | No.9: Wean to finish                           | 1500                      | 1              | 29/90           |
| HLD  | Mar.           | No.10: Wean to finish                          | 1500                      | 1              | 1/30            |
|      | Jan.           | No.11: Self-propagation pig farm with 300 sows | 1400                      | 1              | 5/68            |
|      | Mar.           | No.12: Pig breeding farm                       | 1000                      | 1              | 62/267          |
| SY   | Feb.           | No.13: Pig breeding farm                       | 1100                      | 1              | 254/682         |
|      | Apr.           | No.14: Wean to finish                          | 7000                      | 1              | 93/215          |
|      | Apr.           | No.15: Self-propagation pig farm with 800 sows | 5000                      | 1              | 103/194         |
